# Supplementary material
Source: PubMed Central journal article supplement (PMC3884529)
Supplement: neo1512_1379SD1.pdf [file neo1512_1379SD1.pdf]

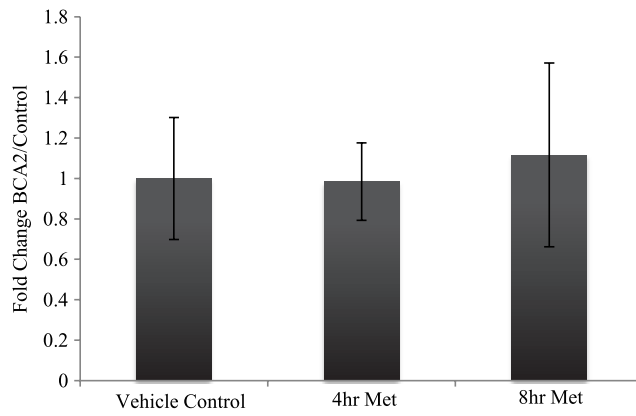

**Figure W1.** The metformin-induced BCA2 protein increase is not due to increased transcription.

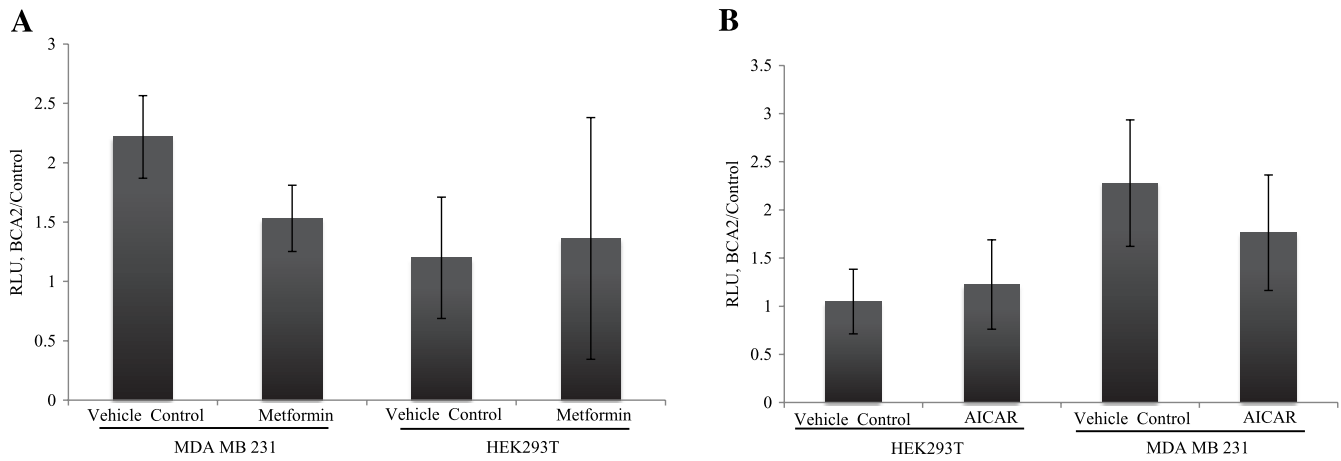

**Figure W2.** BCA2 promoter activity is not increased in response to (A) metformin or (B) AICAR treatment.

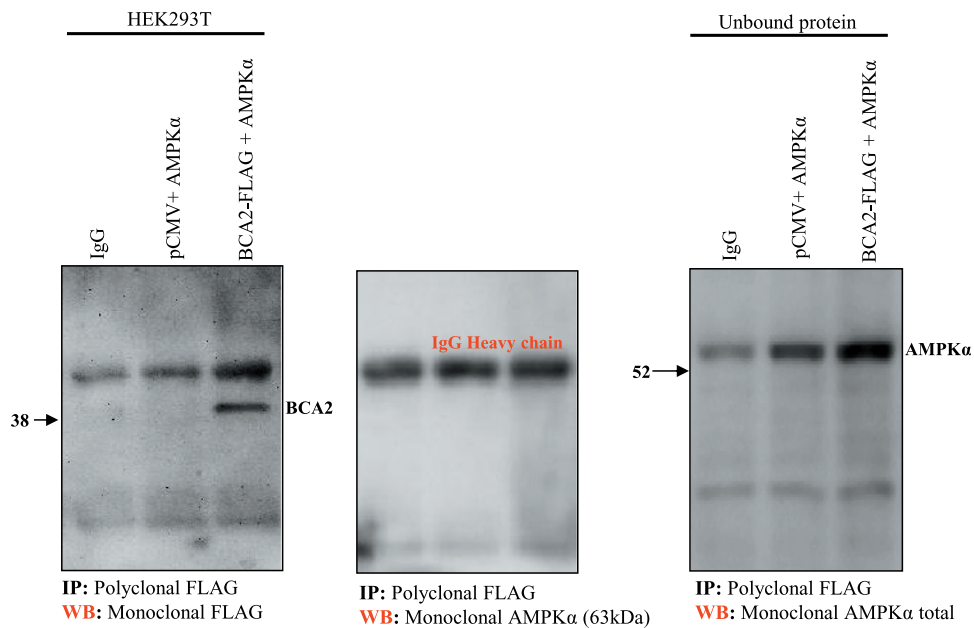

**Figure W3.** BCA2 does not directly bind to the  $\alpha$  subunit of AMPK.
